# Supplementary material
Source: Elsevier journal article supplement (http://openaccess.sgul.ac.uk/99933/1/mmc1.doc)
Supplement: mmc1 [file mmc1.doc]

Web Table 1. Adjusted estimates of the OR of MI and stroke using the point estimate, upper and lower limits of the Regression Dilution Ratio for MMP-9

|  | Original ORa | OR Corrected using RDR | | |
| --- | --- | --- | --- | --- |
|  |  | Lower CI of RDR (0.32) | Point estimate of RDR (0.46) | Upper CI of RDR (0.6) |
| *Estimates of OR for MI* | | |  |  |
| **Full sample** | | |  |  |
| Model 1 | 1.53(1.09,2.13) | 3.78(1.31,10.62) | 2.52(1.21,5.17) | 2.03(1.15,3.53) |
| Model 2 | 1.40(0.99,1.97) | 2.86(0.97,8.32) | 2.08(0.98,4.37) | 1.75(0.98,3.10) |
| Model 3 | 1.36(0.96,1.94) | 2.61(0.88,7.93) | 1.95(0.92,4.22) | 1.67(0.93,3.02) |
| Model 4 | 1.18(0.81,1.70) | 1.68(0.52,5.25) | 1.43(0.63,3.17) | 1.32(0.70,2.42) |
|  |  |  |  |  |
| **Sample without pre-existing disease** | | | |  |
| Model 1 | 1.24(0.84,1.82) | 1.60(0.68,3.68) | 1.96(0.58,6.50) | 1.43(0.75,2.71) |
| Model 2 | 1.09(0.71,1.63) | 1.21(0.47,2.89) | 1.31(0.34,4.60) | 1.15(0.57,2.26) |
| Model 3 | 1.01(0.67,1.54) | 1.03(0.29,3.85) | 1.02(0.42,2.56) | 1.02(0.51,2.05) |
| Model 4 | 0.85(0.55,1.31) | 0.60(0.15,2.33) | 0.70(0.27,1.80) | 0.76(0.37,1.57) |
|  |  |  |  |  |
| **Sample with pre-existing disease** | | | |  |
| Model 1 | 2.20(1.04,4.64) | 11.75(1.13,121.02) | 5.55(1.09,28.12) | 3.72(1.07,12.91) |
| Model 2 | 2.17(1.00,4.71) | 11.26(1.00,126.82) | 5.39(1.00,29.05) | 3.64(1.00,13.23) |
| Model 3 | 2.39(1.05,5.44) | 15.22(1.16,198.95) | 6.65(1.11,39.73) | 4.27(1.08,16.83) |
| Model 4 | 2.52(1.08,5.87) | 17.96(1.27,252.34) | 7.46(1.18,46.88) | 4.67(1.14,19.10) |
|  |  |  |  |  |
| *Estimates of OR for stroke* | | |  |  |
| **Full sample** | | |  |  |
| Model 1 | 1.36(0.92,2.00) | 2.61(0.77,8.72) | 1.95(0.83,4.51) | 1.67(0.87,3.17) |
| Model 2 | 1.29(0.87,1.91) | 2.22(0.65,7.55) | 1.74(0.74,4.08) | 1.53(0.79,2.94) |
| Model 3 | 1.17(0.78,1.74) | 1.63(0.46,5.65) | 1.41(0.58,3.33) | 1.30(0.66,2.52) |
| Model 4 | 1.09(0.72,1.67) | 1.31(0.36,4.97) | 1.21(0.49,3.05) | 1.15(0.58,2.35) |
|  |  |  |  |  |
| **Sample without pre-existing disease** | | | |  |
| Model 1 | 1.48(0.95,2.32) | 3.40(0.85,13.87) | 2.34(0.89,6.23) | 1.92(0.92,4.07) |
| Model 2 | 1.42(0.90,2.23) | 2.99(0.72,12.26) | 2.14(0.80,5.72) | 1.79(0.84,3.81) |
| Model 3 | 1.30(0.81,2.06) | 2.27(0.52,9.57) | 1.77(0.63,4.81) | 1.55(0.70,3.34) |
| Model 4 | 1.22(0.75,1.99) | 1.86(0.41,8.59) | 1.54(0.54,4.46) | 1.39(0.62,3.15) |
|  |  |  |  |  |
| **Sample with pre-existing disease** | | | |  |
| Model 1 | 1.00(0.42,2.39) | 1.00(0.07,15.22) | 1.00(0.15,6.65) | 1.00(0.24,4.27) |
| Model 2 | 1.01(0.42,2.42) | 1.03(0.07,15.83) | 1.02(0.15,6.83) | 1.02(0.24,4.36) |
| Model 3 | 0.86(0.33,2.25) | 0.62(0.03,12.61) | 0.72(0.09,5.83) | 0.78(0.16,3.86) |
| Model 4 | 0.77(0.28,2.14) | 0.44(0.02,10.78) | 0.57(0.06,5.23) | 0.65(0.12,3.55) |

aOR for event comparing lowest tertile of MMP-9 (based on distribution in control sample) to highest tertile of MMP-9 (tertiles defined in Tables 3 and 4).

Model 1= age + gender + region

Model 2= model 1 + smoking

Model 3= model 2+ alcohol use, physical activity, history of diabetes, BMI SBP DBP TC and HDL

Model 4= model 3 +IL-6 + CRP
